# Supplementary material
Source: publisher site journal article supplement (https://www.spandidos-publications.com/3447/downloadSupplementary)

Figure S1. Effects of different durations of G-Re treatment on NO production, and iNOS and COX-2 expression in LPS-stimulated BV2 microglial cells. BV2 cells were treated with 5  $\mu\text{g}/\text{ml}$  G-Re for the indicated durations and then incubated with or without LPS (1  $\mu\text{g}/\text{ml}$ ) for 24 h. NO content was measured using the Griess reaction. Protein expression levels of iNOS and COX-2 were detected by western blotting. \* $P < 0.05$  vs. the group treated with LPS alone. COX-2, cyclooxygenase 2; G-Re, ginsenoside Re; iNOS, inducible NO synthase; LPS, lipopolysaccharide; NO, nitric oxide.

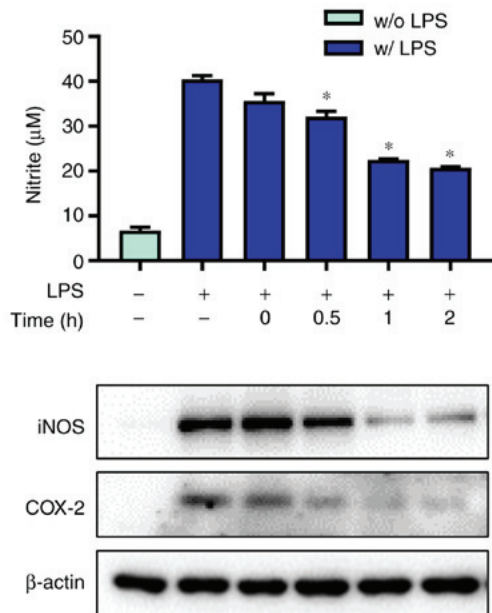

Figure S2. Effect of G-Re and/or kinase inhibitors on NO production, and iNOS and COX-2 expression in LPS-stimulated BV2 microglial cells. BV2 cells were treated with 5  $\mu\text{g/ml}$  G-Re and/or kinase inhibitors [KN93 (5  $\mu\text{M}$ ), PD98059 (5  $\mu\text{M}$ ) or SP600125 (5  $\mu\text{M}$ )] for 1 h and then incubated with or without LPS (1  $\mu\text{g/ml}$ ) for 24 h. NO content was measured using the Griess reaction. Protein expression levels of iNOS and COX-2 were detected by western blotting (lower panel). \* $P < 0.05$  vs. LPS-alone. COX-2, cyclooxygenase 2; G-Re, ginsenoside Re; iNOS, inducible NO synthase; LPS, lipopolysaccharide; NO, nitric oxide.

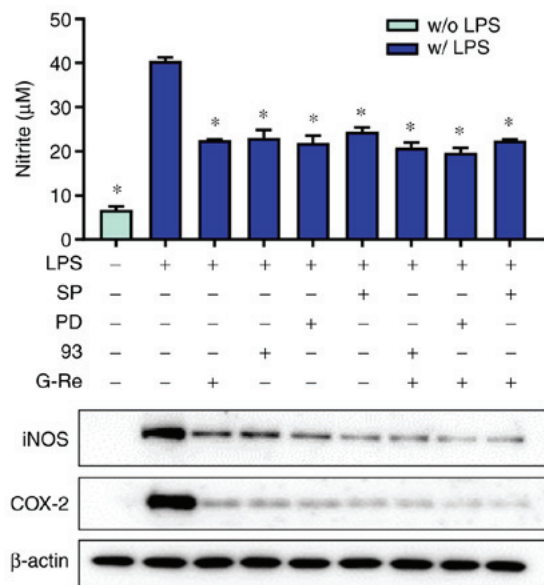

Supplement: Supplementary file 1 [file downloadSupplementary]
